# Supplementary material for: Comprehensive efforts to increase adherence to statin therapy
Source: Oxford University Press journal article supplement (doi:10.1093/eurheartj/ehw628), 2016-12-08
Supplement: table_adherence_paper1_ehw628.docx [file table_adherence_paper1_ehw628.docx]

Table 2. Summary of published data on statin adherence

| Ellis JJ et al. | Suboptimal statin adherence and discontinuation in primary and secondary prevention populations | J Gen Intern Med 2004 |
| --- | --- | --- |
| Gisiason GH et al. | Long-term compliance with beta-blockers, angiotensin-converting enzyme inhibitors, and statins after acute myocardial infarction | Eur Heat J 2006 |
| Larsen J et al. | High persistence of statin use in a Danish population: compliance study 1993-1998 | Br J Clin Pharmacol 2002 |
| De Blois J et al. | ESC guideline adherence is associated with improved survival in patients from the Norwegian Heart Failure Registry | Eur Heart J - Cardiovascular Pharmacotherapy 2015 |
| Hirsh BJ et al. | Utilization of and adherence to guideline-recommended lipid-lowering therapy after acute coronary syndrome: opportunities for improvement | J Am Coll Cardiol 2015 |
| Gomez Sandoval YH et al. | Statin discontinuation in high-risk patients: a systematic review of the evidence | Curr Pharm Des 2011 |
| Daskalopoulou SS. | When statin therapy stops: implications for the patient. | Curr Opin Cardiol 2009 |
| Thengilsdottir G et al. | Do patients initiate therapy? Primary non-adherence to statins and antidepressants in Iceland. | Int J Clin Pract 2015 |
| Urquhart J et al. | New findings about patient adherence to prescribe drug dosing regimes. | Eur J Hosp Pharm Sci 2005 |
| Osterberg L et al. | Adherence to medication | N Engl J Med 2005 |
| Fischer MA et al. | Primary medication non-adherence: analysis of 195,930 electronic prescriptions. | J Gen Intern Med 2010 |
| Raebel MA et al. | Characteristics of patients with primary non-adherence to medications for hypertension, diabetes, and lipid disorders. | J Gen Intern Med 2012 |
| Cheetham TC et al. | Primary nonadherence to statin medications in a managed care organization. | J Manag Care Pharm 2013 |
| Lemstra M et al. | Proportion and risk indicators of nonadherence to statin therapy: a meta-analysis. | Can J Cardiol 2012 |
| Mann DM et al. | Predictors of nonadherence to statins: a systematic review and meta-analysis | Ann Pharmacother 2010 |
| Maningat P et al. | How do we improve patient compliance and adherence to long-term statin therapy? | Curr Atheroscler Rep 2013 |
| Kocas C et al. | The role of media on statin adherence. | Int J Cardiol 2015 |
| Schedlbauer A et al. | Interventions to improve adherence to lipid lowering medication. | Cochrane Database Syst Rev 2010 |
| Petrilla AA et al. | Evidence-based interventions to improve patient compliance with antihypertensive and lipid-lowering medications | Int J Clin Pract 2005 |
| Viswanathan M et al. | Interventions to improve adherence to self-administered medications for chronic diseases in the United States: a systematic review | Ann Intern Med 2012 |
| Casula M et al. | A simple informative intervention in primary care increases statin adherence | Eur J Clin Pharmacol 2016 |
| Derose SF et al. | Automated outreach to increase primary adherence to cholesterol-lowering medications. | JAMA Intern Med 2013 |
| Zullig LL et al. | A protocol to evaluate the efficacy, perceptions, and cost of a cholesterol packaging approach to improve medication adherence | Contemp Clin Trials 2014 |
| Wouters H et al. | Understanding statin non-adherence: knowing which perceptions and experiences matter to different patients | PLoS One 2016 |
|  |  |  |
