# Supplementary material for: Comprehensive efforts to increase adherence to statin therapy
Source: Oxford University Press journal article supplement (doi:10.1093/eurheartj/ehw628), 2016-12-08
Supplement: table_ldl_goal1_ehw628.docx [file table_ldl_goal1_ehw628.docx]

Table 3. Summary of published data on lipid goal attainment

| Spinler SA et al. | Frequency of Attainment of Low-Density Lipoprotein Cholesterol and Non-High-Density Lipoprotein Cholesterol Goals in Cardiovascular Clinical Practice (from the National Cardiovascular Data Registry PINNACLE Registry). | Am J Cardiol 2015 |
| --- | --- | --- |
| Shimizu R. et al. | Serum Lipid Goal Attainment in Chronic Kidney Disease (CKD) Patients under the Japan Atherosclerosis Society (JAS) 2012 Guidelines. | J Atheroscler Thromb 2015 |
| Ambegaonkar BM et al. | Achieving goal lipid levels with ezetimibe plus statin add-on or switch therapy compared with doubling the statin dose. A pooled analysis. | Atherosclerosis 2014 |
| Rizos CV | Reaching low density lipoprotein cholesterol targets. | Curr Med Res Opin 2014 |
| Barkas F et al. | Lipid target achievement among patients with very high and high cardiovascular risk in a lipid clinic. | Angiology 2015 |
| Farahani P et al. | Household income and LDL-C goal attainment in patients with diabetes and dyslipidemia in a Canadian dataset. | Clin Invest Med 2014 |
| Lee JA et al. | Achieving recommended low density lipoprotein cholesterol goals and the factors associated with target achievement of hypercholesterolemia patients with rosuvastatin in primary care. | Curr Med Res Opin 2013 |
| Navarro Vidal B et al. | Achievement of LDL-C goals depends on baseline LDL-C and choice and dose of statin: an analysis from the VOYAGER database. | PLoS One 2013 |
| Ali MK et al. | Achievement of goals in U.S. diabetes care, 1999-2010. | N Engl J Med 2013 |
| Tattersall MC | .  Trends in low-density lipoprotein cholesterol goal achievement in high risk United States adults: longitudinal findings from the 1999-2008 National Health and Nutrition Examination Surveys. | PLoS One 2013 |
| DeGuzman PB et al. | Sub-optimal achievement of guideline-derived lipid goals in management of diabetes patients with atherosclerotic cardiovascular disease, despite high use of evidence-based therapies. | Diab Vasc Dis Res 2012 |
| Benegas JR et al. | Achievement of lipoprotein goals among patients with metabolic syndrome at high cardiovascular risk across Europe. The EURIKA study. | Int J Cardiol 2013 |
| Benegas JR et al. | Achievement of treatment goals for primary prevention of cardiovascular disease in clinical practice across Europe: the EURIKA study. | Eur Heart J 2011 |
| Gitt AK et al | Persistent lipid abnormalities in statin-treated patients and predictors of LDL-cholesterol goal achievement in clinical practice in Europe and Canada. | Eur J Prev Cardiol 2012 |
| Melloni C et al. | Lipid-lowering intensification and low-density lipoprotein cholesterol achievement from hospital admission to 1-year follow-up after an acute coronary syndrome event: results from the Medications ApplIed aNd SusTAINed Over Time (MAINTAIN) registry. | Am Heart J 2010 |
| Vonbank A et al. | Current cholesterol guidelines and clinical reality: a comparison of two cohorts of coronary artery disease patients | Swiss Med Wkly 2013 |
